# Supplementary material for: Effect of Glucose Improvement on Nocturnal Sleep Breathing Parameters in Patients with Type 2 Diabetes: The Candy Dreams Study
Source: PubMed Central journal article supplement (PMC7230160; doi:10.3390/jcm9041022), 2020-04-04
Supplement: jcm-09-01022-s001.pdf [file jcm-09-01022-s001.pdf]

**Supplemental Figure 1.** Flow chart of the study population.

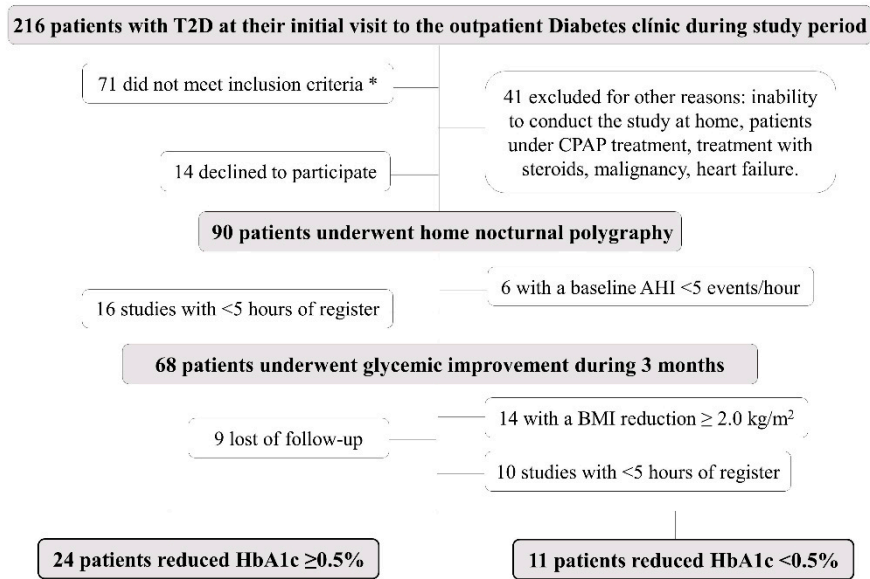

The inclusion criteria included: age between 40 and 70 years old, BMI lower than 40 kg/m<sup>2</sup>, HbA1c ≥ 7.5% (58 mmol/mol), absence of medical history of lung disease, and T2D with at least 5 years of follow-up. T2D: type 2 diabetes; CPAP: continuous positive airway pressure; AHI: apnea-hypopnea index; BMI: body mass index; HbA1c: glycated hemoglobin..

**Figure S1:** Flow chart of the study population

**Supplemental Table S1.** Baseline main clinical, metabolic and nocturnal sleep breathing characteristics of participants in the study according to their response to the intensification of antidiabetic treatment.

|                                      | All patients | Good responders | Non-responders | p      |
|--------------------------------------|--------------|-----------------|----------------|--------|
| n                                    | 35           | 24              | 11             | -      |
| <b>Clinical data</b>                 |              |                 |                |        |
| Men, n (%)                           | 22 (62.8)    | 15 (62.5)       | 7 (63.6)       | 0.626  |
| Age (yrs)                            | 55.6 ± 7.4   | 56.5 ± 7.1      | 53.6 ± 8.2     | 0.294  |
| BMI (Kg/m <sup>2</sup> )             | 35.1 ± 4.5   | 34.5 ± 4.6      | 36.3 ± 4.3     | 0.282  |
| Decrease in BMI (kg/m <sup>2</sup> ) | -0.15 ± 0.7  | -0.1 ± 0.7      | 0.0 ± 0.5      | 0.518  |
| Decrease in Kg (kg)                  | -0.01 ± 2.0  | -0.3 ± 2.1      | -0.2 ± 1.6     | 0.394  |
| Waist circumference (cm)             | 116.3 ± 12.4 | 115.7 ± 12.8    | 117.4 ± 12.2   | 0.727  |
| Neck circumference (cm)              | 41.9 ± 3.8   | 41.4 ± 4.0      | 43.1 ± 3.3     | 0.232  |
| CUN-BAE (%)                          | 41.4 ± 6.7   | 40.9 ± 6.6      | 42.5 ± 7.0     | 0.538  |
| Bonora equation (cm <sup>2</sup> )   | 272.4 ± 79.4 | 270.7 ± 80.5    | 275.9 ± 80.7   | 0.863  |
| Never smokers (%)                    | 18 (51.4)    | 10 (41.6)       | 8 (72.7)       | 0.146  |
| Known diabetes duration (yrs)        | 11.7 ± 7.8   | 12.1 ± 8.0      | 10.7 ± 7.5     | 0.621  |
| Diabetic Retinopathy, n (%)          | 12 (34.2)    | 9 (25.7)        | 3 (30.0)       | 0.709  |
| Ischemic heart disease, n (%)        | 5 (14.2)     | 3 (12.0)        | 2 (20.0)       | 0.640  |
| <b>Metabolic data</b>                |              |                 |                |        |
| Baseline HbA1c (%)                   | 8.8 ± 0.9    | 8.8 ± 0.9       | 8.6 ± 0.9      | 0.495  |
| Baseline HbA1c (mmol/mol)            | 72.7 ± 10.1  | 73.4 ± 9.9      | 71.0 ± 10.7    | 0.529  |
| Decrease in HbA1c (%)                | -0.9 ± 1.1   | -1.5 ± 0.7      | 0.3 ± 0.5      | <0.001 |
| Decrease in HbA1c (mmol/mol)         | -10.1 ± 12.0 | -16.5 ± 8.0     | 3.6 ± 6.1      | <0.001 |

|                                        |                    |                    |                    |       |
|----------------------------------------|--------------------|--------------------|--------------------|-------|
| FPG (mmol/l)                           | 195.1 ± 68.6       | 188.5 ± 66.0       | 209.4 ± 75.1       | 0.411 |
| Triglycerides (mg/dl)                  | 183.0 (72.0-701.0) | 142.0 (72.0-366.0) | 183.0 (82.0-701.0) | 0.540 |
| LDL-cholesterol (mg/dl)                | 114.9 ± 35.2       | 112.3 ± 38.5       | 120.4 ± 28.2       | 0.541 |
| ACR (mg/g)                             | 79.9 ± 16.3        | 78.9 ± 16.5        | 81.3 ± 16.3        | 0.582 |
| <b>Nocturnal sleep breathing data</b>  |                    |                    |                    |       |
| AHI (events per hour)                  | 28.5 (6.5 to 95.0) | 26.1 (8.6 to 95.0) | 31.4 (6.5 to 63.2) | 0.334 |
| CT90 (%)                               | 12.0 (0.0 to 87.9) | 13.3 (0.4 to 69.0) | 11.8 (0.0 to 87.8) | 0.847 |
| Baseline SaO <sub>2</sub> (%)          | 97.8 ± 1.1         | 97.7 ± 1.0         | 98.0 ± 1.5         | 0.611 |
| ODI 3% (events per hour)               | 40.3 ± 24.0        | 37.6 ± 21.2        | 40.3 ± 21.9        | 0.468 |
| Average nocturnal SaO <sub>2</sub> (%) | 91.4 ± 2.1         | 91.2 ± 1.8         | 92.0 ± 2.7         | 0.409 |
| Minimum nocturnal SaO <sub>2</sub> (%) | 75.3 ± 9.4         | 76.0 ± 10.0        | 73.3 ± 7.8         | 0.504 |
| Epworth questionnaire                  | 5.8 ± 3.5          | 5.7 ± 3.3          | 6.1 ± 4.1          | 0.733 |

Data are mean ± SD, median (range) or n (percentage). BMI: body mass index; FPG: fasting plasma glucose; LDL: low density lipoprotein; ACR: albuminuria-to-creatinine ratio; SaO<sub>2</sub>: arterial oxygen saturation ( )

**Supplemental Table S2.** Characteristics of the main nocturnal sleep breathing parameters according to the antidiabetic treatment (insulin or glucagon like peptide 1 receptor analogue) prescribed at the end of the follow-up period.

|                               | Insulin            | GLP-1ra             | Insulin plus<br>GLP-1ra | p ANOVA |
|-------------------------------|--------------------|---------------------|-------------------------|---------|
| n                             | 13                 | 6                   | 11 12                   | -       |
| <b>Baseline</b>               |                    |                     |                         |         |
| HbA1c (%)                     | 9.2 ± 1.0          | 8.7 ± 0.8           | 8.5 ± 0.7               | 0.190   |
| HbA1c (mmol/mol)              | 77.3 ± 11.1        | 72.1 ± 9.5          | 69.1 ± 8.1              | 0.187   |
| Epworth                       | 5.8 ± 3.1          | 7.1 ± 4.6           | 5.5 ± 3.8               | 0.688   |
| AHI (events/hour)             | 28.5 (8.6 to 63.2) | 25.8 (6.5 to 44.6)  | 30.9 (10.4 to 79.0)     | 0.676   |
| CT90 (%)                      | 9.5 (0.0 to 61.0)  | 10.4 (5.5 to 31.0)  | 14.3 (0.4 to 87.8)      | 0.727   |
| ODI 3% (events per hour)      | 43.5 ± 25.8        | 29.2 ± 18.7         | 42.9 ± 21.6             | 0.421   |
| Baseline SaO <sub>2</sub> (%) | 98.2 ± 1.0         | 98.0 ± 0.0          | 97.6 ± 1.4              | 0.578   |
| Average SaO <sub>2</sub> (%)  | 92.1 ± 2.0         | 91.0 ± 1.0          | 90.6 ± 2.3              | 0.229   |
| Minimum SaO <sub>2</sub> (%)  | 80.1 ± 4.9         | 69.3 ± 8.6          | 69.8 ± 11.4             | 0.019   |
| <b>End of study</b>           |                    |                     |                         |         |
| HbA1c (%)                     | 8.2 ± 1.0          | 7.9 ± 1.4           | 7.6 ± 0.7               | 0.391   |
| HbA1c (mmol/mol)              | 66.7 ± 10.9        | 63.8 ± 15.9         | 60.0 ± 15.9             | 0.356   |
| Epworth                       | 5.6 ± 2.9          | 4.6 ± 2.8           | 4.6 ± 2.9               | 0.687   |
| AHI (events/hour)             | 21.3 (5.2 to 62.4) | 20.3 (11.2 to 49.3) | 34.2 (4.0 to 62.1)      | 0.586   |
| CT90 (%)                      | 8.2 (0.0 to 36.0)  | 5.9 (0.4 to 10.0)   | 10.0 (0.5 to 71.2)      | 0.234   |
| ODI 3% (events per hour)      | 38.9 ± 26.5        | 23.8 ± 16.1         | 39.7 ± 20.1             | 0.331   |
| Baseline SaO <sub>2</sub> (%) | 97.4 ± 1.4         | 98.0 ± 1.2          | 98.4 ± 1.2              | 0.244   |
| Average SaO <sub>2</sub> (%)  | 92.0 ± 2.9         | 92.4 ± 0.8          | 91.1 ± 2.5              | 0.590   |
| Minimum SaO <sub>2</sub> (%)  | 80.5 ± 7.2         | 72.8 ± 13.4         | 67.6 ± 13.6             | 0.045   |

HbA1c: glycated hemoglobin; AHI: apnea-hypopnea index; CT90: time of register with oxygen arterial saturation below 90%; SaO<sub>2</sub>: arterial oxygen saturation.

**Supplemental Table 3.** Evolution of the main nocturnal sleep breathing parameters according to the antidiabetic treatment (insulin or glucagon like peptide 1 receptor analogue) prescribed at the end of the follow-up period.

|                                   | Baseline            | End of study        | Mean difference<br>(95% CI) | p     |
|-----------------------------------|---------------------|---------------------|-----------------------------|-------|
| <b><u>Insulin</u></b>             |                     |                     |                             |       |
| n                                 | 13                  | 13                  | -                           | -     |
| Good responders, n (%)            | -                   | 9 (69.2)            | -                           | -     |
| HbA1c (%)                         | 9.2 ± 1.0           | 8.2 ± 1.0           | -0.9 (-1.5 to -0.3)         | 0.007 |
| HbA1c (mmol/mol)                  | 77.3 ± 11.1         | 66.7 ± 10.9         | -10.5 (-17.5 to -3.4)       | 0.007 |
| BMI (kg/m <sup>2</sup> )          | 31.5 ± 3.2          | 31.6 ± 3.0          | 0.1 (-0.3 to 0.5)           | 0.652 |
| Epworth                           | 5.8 ± 3.1           | 5.6 ± 2.9           | -0.1 (-0.9 to 0.6)          | 0.617 |
| AHI (events/hour)                 | 28.5 (8.6 to 63.2)  | 21.3 (5.2 to 62.4)  | -                           | 0.003 |
| CT90 (%)                          | 9.5 (0.0 to 61.0)   | 8.2 (0.0 to 36.0)   | -                           | 0.047 |
| ODI 3% (events per hour)          | 46.1 ± 25.1         | 38.9 ± 26.5         | -7.2 (-12.9 to -1.4)        | 0.019 |
| Baseline SaO <sub>2</sub> (%)     | 98.5 ± 1.0          | 97.3 ± 1.7          | -1.1 (-2.7 to 0.3)          | 0.110 |
| Average SaO <sub>2</sub> (%)      | 92.1 ± 2.1          | 92.0 ± 2.9          | -0.09 (-1.3 to 1.1)         | 0.878 |
| Minimum SaO <sub>2</sub> (%)      | 81.0 ± 3.9          | 80.5 ± 7.2          | -0.5 (-4.7 to 3.6)          | 0.780 |
| <b><u>arGLP1</u></b>              |                     |                     |                             |       |
| n                                 | 6                   | 6                   | -                           | -     |
| Good responders, n (%)            | -                   | 3 (50.0)            | -                           | -     |
| HbA1c (%)                         | 8.7 ± 0.8           | 7.9 ± 1.4           | -0.7 (-2.0 to -0.5)         | 0.192 |
| HbA1c (mmol/mol)                  | 70.2 ± 7.9          | 60.2 ± 8.1          | -10.0 (-17.9 to -2.0)       | 0.192 |
| BMI (kg/m <sup>2</sup> )          | 39.3 ± 3.7          | 39.1 ± 4.2          | -0.1 (-1.0 to 0.6)          | 0.582 |
| Epworth                           | 6.4 ± 4.7           | 4.6 ± 2.8           | -1.8 (-4.6 to 1.0)          | 0.152 |
| AHI (events/hour)                 | 25.8 (6.5 to 44.6)  | 20.3 (11.2 to 49.3) | -                           | 0.917 |
| CT90 (%)                          | 10.4 (5.5 to 31.0)  | 5.9 (0.4 to 10.0)   | -                           | 0.116 |
| ODI 3% (events per hour)          | 29.2 ± 18.7         | 23.8 ± 16.1         | -5.3 (-21.5 to 10.7)        | 0.431 |
| Baseline SaO <sub>2</sub> (%)     | 98.0 ± 0.0          | 98.5 ± 2.1          | 0.5 (-18.5 to 19.5)         | 0.795 |
| Average SaO <sub>2</sub> (%)      | 91.0 ± 1.0          | 92.6 ± 0.5          | 1.6 (-1.2 to 4.5)           | 0.130 |
| Minimum SaO <sub>2</sub> (%)      | 69.3 ± 8.6          | 74.6 ± 17.3         | 0.5 (-22.1 to 32.8)         | 0.491 |
| <b><u>Insulin plus arGLP1</u></b> |                     |                     |                             |       |
| n                                 | 12                  | 12                  | -                           | -     |
| Good responders, n (%)            | -                   | 9 (75.0)            | -                           | -     |
| HbA1c (%)                         | 8.5 ± 0.7           | 7.6 ± 0.7           | -0.9 (-1.6 to -0.2)         | 0.017 |
| HbA1c (mmol/mol)                  | 70.2 ± 7.9          | 60.2 ± 8.1          | -10.0 (-17.9 to -2.0)       | 0.017 |
| BMI (kg/m <sup>2</sup> )          | 36.8 ± 3.1          | 36.7 ± 2.9          | -0.0 (-0.3 to 0.1)          | 0.510 |
| Epworth                           | 5.4 ± 3.6           | 4.5 ± 2.8           | -0.8 (-2.1 to 0.4)          | 0.193 |
| AHI (events/hour)                 | 30.9 (10.4 to 95.0) | 33.8 (4.0 to 62.1)  | -                           | 0.814 |
| CT90 (%)                          | 14.3 (0.4 to 87.8)  | 9.7 (0.5 to 7.1)    | -                           | 0.117 |
| ODI 3% (events per hour)          | 42.9 ± 21.6         | 39.7 ± 20.1         | -3.1 (-13.4 to 7.0)         | 0.508 |
| Baseline SaO <sub>2</sub> (%)     | 97.6 ± 1.4          | 98.4 ± 1.2          | 0.8 (-0.1 to 1.7)           | 0.082 |
| Average SaO <sub>2</sub> (%)      | 90.6 ± 2.3          | 91.1 ± 2.5          | 0.5 (-0.5 to 1.7)           | 0.304 |
| Minimum SaO <sub>2</sub> (%)      | 69.8 ± 11.4         | 67.6 ± 13.5         | -2.1 (-0.6 to 2.1)          | 0.286 |

HbA1c: glycated hemoglobin; AHI: apnea-hypopnea index; CT90: time of register with oxygen arterial saturation below 90%; SaO<sub>2</sub>: arterial oxygen saturation; GLP-1ra: glucagon like peptide 1 receptor analogue.

**Supplemental Table S4.** Correlations of clinical variables with absolute changes in the nocturnal sleep breathing parameters in participants with type 2 diabetes.

|                                                   | $\Delta$ AHI<br>(events/hour) |       | $\Delta$ CT90 (%) |       | $\Delta$ Average<br>SaO <sub>2</sub> (%) |       | $\Delta$ Minimum<br>SaO <sub>2</sub> (%) |       |
|---------------------------------------------------|-------------------------------|-------|-------------------|-------|------------------------------------------|-------|------------------------------------------|-------|
|                                                   | r                             | p     | r                 | p     | r                                        | p     | r                                        | p     |
| <b>Age</b>                                        | -0.159                        | 0.369 | 0.324             | 0.062 | -0.353                                   | 0.006 | -0.323                                   | 0.087 |
| <b>Baseline HbA1c (%)</b>                         | -0.126                        | 0.476 | -0.140            | 0.429 | 0.238                                    | 0.222 | 0.103                                    | 0.329 |
| <b>Baseline BMI (kg/m<sup>2</sup>)</b>            | 0.055                         | 0.757 | -0.001            | 0.995 | 0.177                                    | 0.360 | -0.110                                   | 0.569 |
| <b>Baseline WC (cm)</b>                           | -0.140                        | 0.431 | -0.112            | 0.528 | 0.108                                    | 0.576 | 0.006                                    | 0.975 |
| <b>Baseline NC (cm)</b>                           | -0.036                        | 0.839 | -0.009            | 0.960 | -0.057                                   | 0.779 | -0.263                                   | 0.108 |
| <b>Known diabetes duration (yrs)</b>              | -0.347                        | 0.044 | 0.137             | 0.438 | -0.454                                   | 0.013 | -0.324                                   | 0.086 |
| <b><math>\Delta</math> HbA1c (%)</b>              | 0.358                         | 0.035 | 0.128             | 0.465 | -0.017                                   | 0.929 | -0.386                                   | 0.039 |
| <b><math>\Delta</math> BMI (kg/m<sup>2</sup>)</b> | -0.034                        | 0.847 | -0.247            | 0.160 | -0.038                                   | 0.845 | -0.178                                   | 0.354 |
| <b><math>\Delta</math> WC (cm)</b>                | -0.137                        | 0.452 | -0.329            | 0.058 | 0.133                                    | 0.491 | -0.190                                   | 0.324 |
| <b><math>\Delta</math> NC (cm)</b>                | -0.015                        | 0.935 | 0.097             | 0.584 | 0.061                                    | 0.752 | 0.433                                    | 0.019 |

$\Delta$ : absolute change; AHI: apnea hypopnea index; CT90: time of register with oxygen saturation below 90%; SaO<sub>2</sub>: arterial oxygen saturation; HbA1c: glycated hemoglobin; BMI: body mass index; WC: waist circumference; NC: neck circumference.
